# Supplementary material
Source: Springer Nature journal article supplement (https://www.springermedizin.de/resource/supplementary/12905_2007_125_MOESM2_ESM.pdf/9519178)
Supplement: MOESM2 [file 9519178]

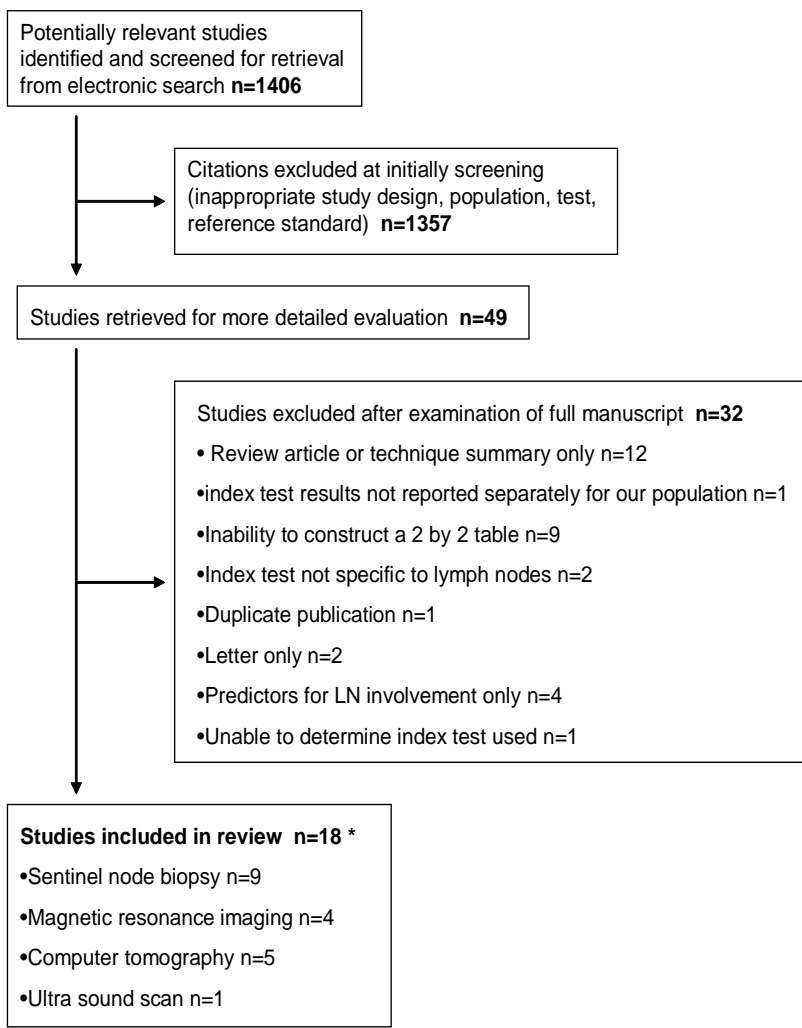

\* One study evaluated more than one test

The reference list for excluded studies is available from the corresponding author
